# Supplementary material for: Leonurus sibiricus L. ethanol extract promotes osteoblast differentiation and inhibits osteoclast formation
Source: PubMed Central journal article supplement — Int J Mol Med. 2019 Jul 8;44(3):913–26. doi: 10.3892/ijmm.2019.4269 (PMC6657961; doi:10.3892/ijmm.2019.4269), 2019-07-08

Figure S1. Effect of LS on an LPS-induced mouse model of bone loss. (A) Daily body weight of LPS-induced mice, (B) the mice were sacrificed after weighing the liver. LS, *Leonurus sibiricus* L.; LPS, lipopolysaccharide; Sham, group treated with PBS and distilled water.

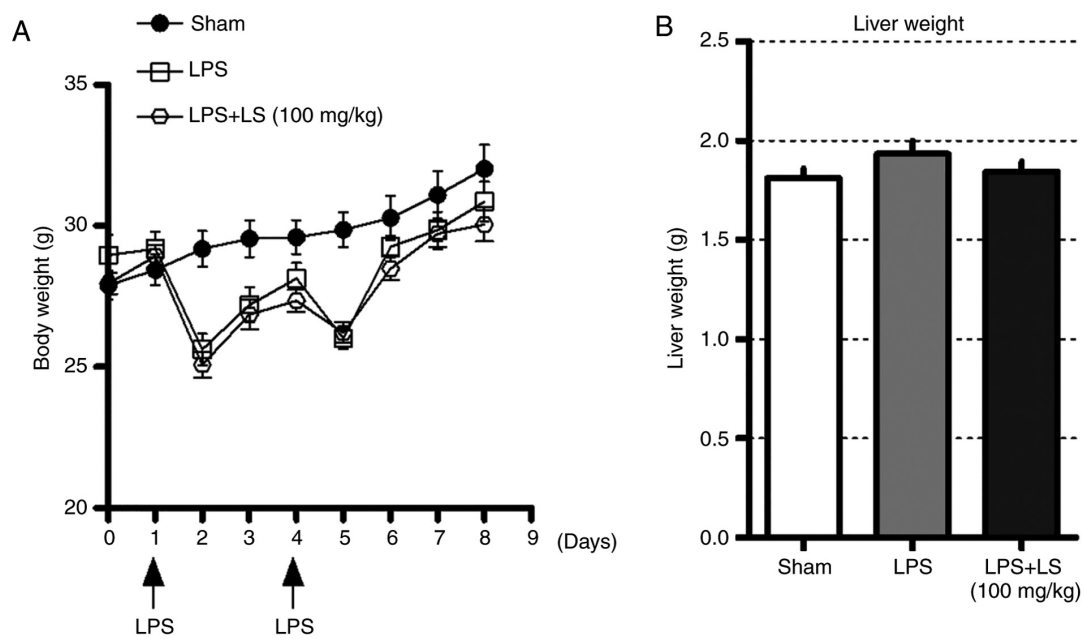

Supplement: Supplementary_Data.pdf [file Supplementary_Data.pdf]
